# Supplementary material for: Detection of a westward hotspot offset in the atmosphere of hot gas giant CoRoT-2b
Source: Springer Nature journal article supplement (doi:10.1038/s41550-017-0351-6), 2018-01-18
Supplement: MOESM7 [file 41550_2017_351_MOESM7_ESM.csv]

#Wavelength (micron)	Planet Radius (Rp/R*)	Uncertainty (Rp/R*)
0.6	0.1682	0.0008
0.825	0.145	0.0117
1.12	0.1459	0.0205
1.65	0.1415	0.017
2.2	0.1461	0.0351
4.5	0.1696	0.0009
